# Supplementary material
Source: Springer Nature journal article supplement (https://www.springermedizin.de/resource/supplementary/12887_2013_1089_MOESM5_ESM.docx/9476494)

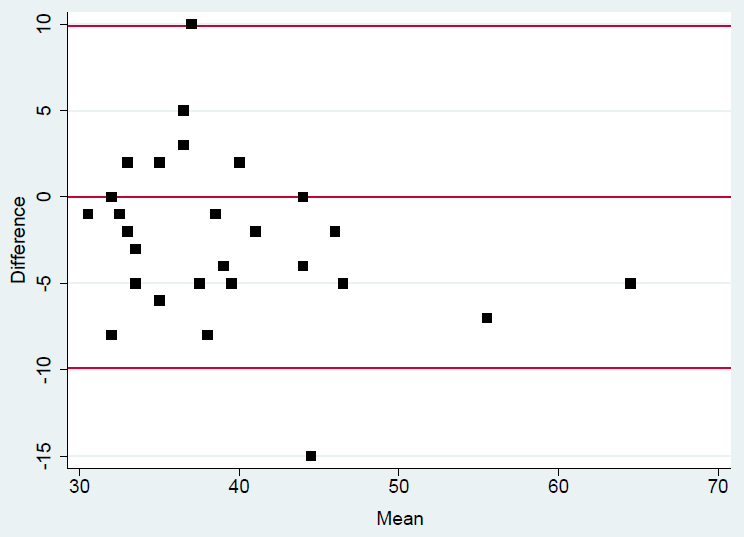

Supplement: MOESM5 [file 9476494]
